# Supplementary material
Source: Royal Society of Chemistry journal article supplement (doi:10.1039/d6ta02240e)
Supplement: d6ta02240e1.pdf [file d6ta02240e1.pdf]

1

## Supporting Information

2 **Enhancing ammonia decomposition in a  $\text{LaCeO}_x/\text{Ni}$  inverse catalyst**  
3 **by tuning lattice strain and oxygen vacancies**

4 Junjie Lu, Lu Cheng, Jingchong Yan<sup>‡</sup>, Weidong Zhang<sup>\*</sup>, Zhiping Lei, Zhanku Li,

5 Shibiao Ren, Zhicai Wang, Hengfu Shui

6 School of Chemistry and Chemical Engineering, Anhui Province Key Laboratory of Coal Clean

7 Conversion and Low Carbon Utilization, Anhui University of Technology, Ma'anshan, 243002,

8 China

9 <sup>\*</sup>Corresponding author. E-mail addresses: [jcyan@ahut.edu.cn](mailto:jcyan@ahut.edu.cn) (J. Yan).

10

11 Considering economic and performance factors, Ni is the preferred non-noble metal  
12 catalyst for ammonia decomposition. Therefore, various inverse Ni-based catalysts  
13 were synthesized using the stepwise precipitation method. As shown in Fig. S1a, at 550  
14 °C, although the ammonia conversion rate of LaCeO<sub>x</sub>/Ni was slightly lower than that  
15 of LaCeO<sub>x</sub>/Ni<sub>40</sub> and LaCeO<sub>x</sub>/Ni<sub>60</sub>, all three achieved over 90% conversion (60000 mL  
16 (g<sub>cat</sub> h)<sup>-1</sup>), indicating that increasing Ni loading beyond 30% has limited effect on  
17 performance improvement. Nevertheless, both the ammonia conversion and hydrogen  
18 production rate of LaCeO<sub>x</sub>/Ni were significantly enhanced by approximately 6% and 4  
19 mmol (g<sub>cat</sub> min)<sup>-1</sup>, respectively, compared to LaCeO<sub>x</sub>/Ni<sub>20</sub> (Fig. S1b). Therefore,  
20 LaCeO<sub>x</sub>/Ni was selected as the optimal balance among activity, economic viability, and  
21 stability. Moreover, as shown in Fig. S1c–d, LaCeO<sub>x</sub>/Ni exhibited notably superior  
22 catalytic performance compared to La<sub>3</sub>Ce<sub>7</sub>O<sub>x</sub>/Ni and La<sub>7</sub>Ce<sub>3</sub>O<sub>x</sub>/Ni, demonstrating that  
23 LaCeO<sub>x</sub> is the optimal support when the Ni loading reaches 30%. In summary,  
24 LaCeO<sub>x</sub>/Ni was confirmed as the optimal combination of metal loading and support  
25 composition within this catalyst system, demonstrating excellent and balanced high  
26 activity across the temperature range of 350–600 °C, indicating significant practical  
27 feasibility.

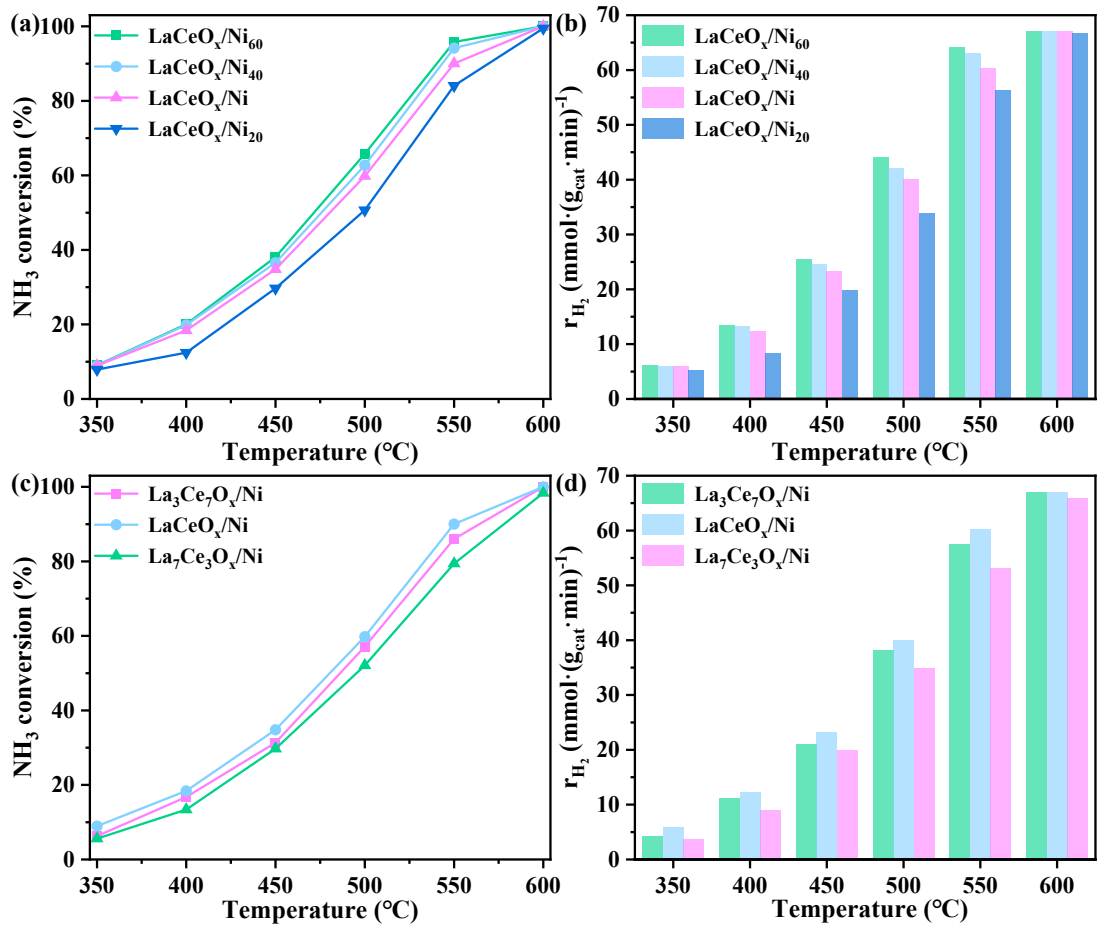

28

29 Fig. S1 Temperature-dependent activities of the LaCeO<sub>x</sub>/Ni catalysts. (a) Different Ni content in  
 30 LaCeO<sub>x</sub>/Ni catalysts (b) Different La content in LaCeO<sub>x</sub>/Ni catalysts. GHSV = 60000 mL (g<sub>cat</sub>

31

h)<sup>-1</sup>

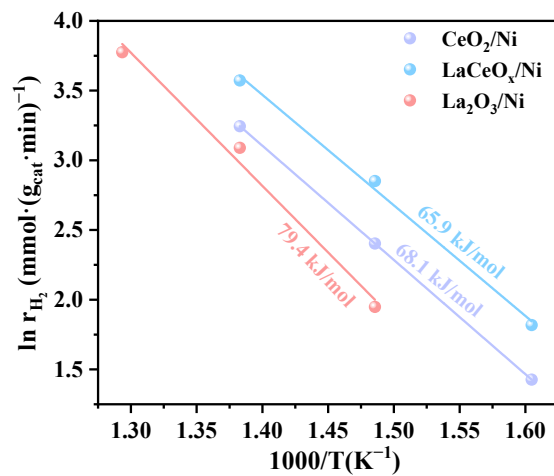

32

33

Fig. S2 Arrhenius plots of CeO<sub>2</sub>/Ni, LaCeO<sub>x</sub>/Ni, and La<sub>2</sub>O<sub>3</sub>/Ni.

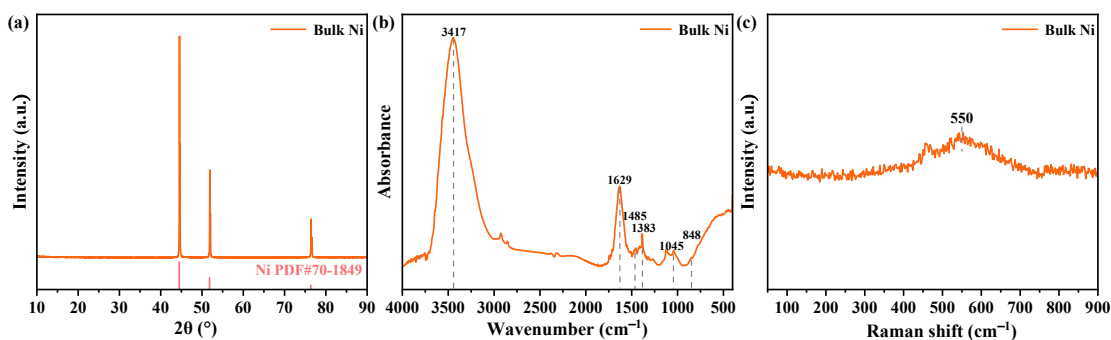

34

35

Fig. S3 (a) XRD pattern, (b) FTIR spectra, (c) and Raman spectra of the Bulk Ni.

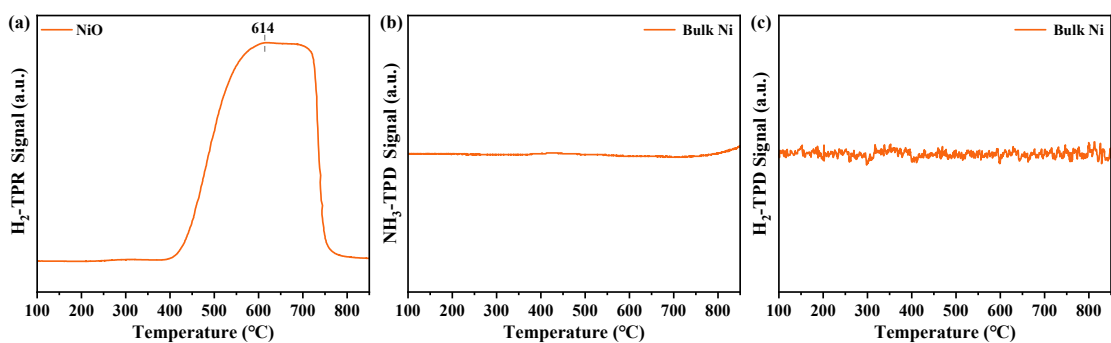

36

37

Fig. S4 (a) H<sub>2</sub>-TPR of the NiO; (b) NH<sub>3</sub>-TPD and (c) H<sub>2</sub>-TPD profiles of the Bulk Ni.

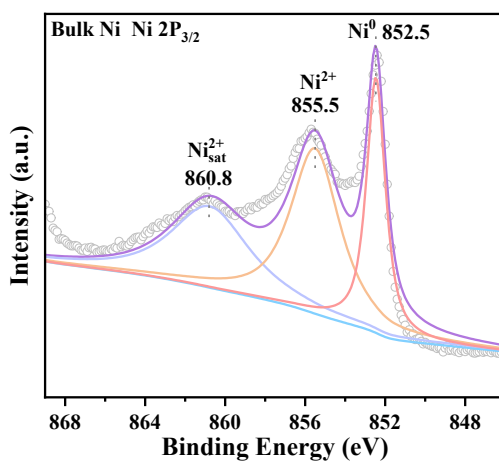

38

39

Fig. S5 Ni 2p<sub>3/2</sub> XPS spectra of the Bulk Ni catalysts.

40

Table S1 XPS, and ICP parameters of the Bulk Ni catalyst.

| Catalysts | Ni (wt%) | Ni <sup>0</sup> /Ni <sup>2+</sup> |
|-----------|----------|-----------------------------------|
| Bulk Ni   | 67.3     | 0.487                             |

41

42
